# Supplementary material for: Novel Trivalent Vectored Vaccine for Control of Myxomatosis and Disease Caused by Classical and a New Genotype of Rabbit Haemorrhagic Disease Virus
Source: PubMed Central journal article supplement (PMC7565868; doi:10.3390/vaccines8030441), 2020-08-05
Supplement: vaccines-08-00441-s001.pdf [file vaccines-08-00441-s001.pdf]

## Supplementary data Myxo-RHD PLUS manuscript

**Table S1A. Observed clinical and local reactions in Study 1 (SPF rabbits)**

| Study day         | Rabbit                                   | Local reaction left injection site                         | Local reaction right injection site |
|-------------------|------------------------------------------|------------------------------------------------------------|-------------------------------------|
| Day 14            | 3.2 (v)                                  | 1 cm diameter                                              | N.a.                                |
|                   | Other vaccinates                         | Thickened skin                                             | N.a.                                |
|                   | All controls                             | No                                                         | N.a.                                |
| Day 15            | 3.2 (v)                                  | 1 cm diameter, enlarged lymphode<br>5 mm diameter          | N.a.                                |
|                   | 3.3., 3.5 (vaccinate<br>representatives) | 5 mm diameter, slightly enlarged<br>lymphode 3 mm diameter | N.a.                                |
|                   | 3.1 (control<br>representative)          | No                                                         | N.a.                                |
| Day 16            | 3.2 (v)                                  | 1 x 0.5 cm                                                 | N.a.                                |
|                   | 2.5, 2.6, 3.3, 3.5,<br>3.6, 4.1, 4.3 (v) | Thickened skin                                             | N.a.                                |
|                   | Other vaccinates                         | No                                                         | N.a.                                |
|                   | All controls                             | No                                                         | N.a.                                |
| Day 18            | 3.2 (v)                                  | 1 x 0.5 cm                                                 | N.a.                                |
|                   | 3.6, 4.1, 4.3 (v)                        | Thickened skin                                             | N.a.                                |
|                   | Other vaccinates                         | No                                                         | N.a.                                |
| Day 21            | 3.2 (v)                                  | 1 x 0.5 cm                                                 | N.a.                                |
|                   | Other vaccinates                         | No                                                         | N.a.                                |
|                   | All controls                             | No                                                         | N.a.                                |
| Day 21 + 4<br>hrs | 2.5 (v)                                  | N.a.                                                       | Thickened skin                      |
|                   | Other vaccinates                         | N.a.                                                       | No                                  |
|                   | All controls                             | N.a.                                                       | No                                  |
| Day 22            | 3.2 (v)                                  | 0.5 cm in diameter                                         | Thickened skin                      |
|                   | 2.5, 4.1, 4.3 (v)                        | No                                                         | Thickened skin                      |
|                   | Other vaccinates                         | No                                                         | No                                  |
|                   | All controls                             | No                                                         | No                                  |
| Day 23            | 3.2 (v)                                  | 0.5 cm in diameter                                         | 0.7 x 1 cm                          |
|                   | 2.5 (v)                                  | No                                                         | 0.5 x 1.5 cm                        |
|                   | 2.6 (v)                                  | No                                                         | 0.5 cm in diameter                  |
|                   | 4.1, 4.3 (v)                             | No                                                         | Thickened skin                      |
|                   | Other vaccinates                         | No                                                         | No                                  |
|                   | All controls                             | No                                                         | No                                  |
| Day 24            | 3.2 (v)                                  | 0.3 cm in diameter                                         | 0.5 x 1 cm                          |
|                   | 2.5 (v)                                  | No                                                         | 0.5 x 1 cm                          |
|                   | 2.6 (v)                                  | No                                                         | 0.3 cm in diameter                  |
|                   | 2.8, 4.1 (v)                             | No                                                         | Thickened skin                      |
|                   | Other vaccinates                         | No                                                         | No                                  |
|                   | All controls                             | No                                                         | No                                  |
| Day 25            | 3.2 (v)                                  | 0.3 cm in diameter                                         | 0.5 x 1 cm                          |
|                   | 2.5 (v)                                  | No                                                         | 0.5 cm in diameter                  |
|                   | 2.8, 4.1 (v)                             | No                                                         | Thickened skin                      |
|                   | Other vaccinates                         | No                                                         | No                                  |
|                   | All controls                             | No                                                         | No                                  |
| Day 26            | 3.2 (v)                                  | 0.2 cm in diameter                                         | 0.5 x 1 cm                          |
|                   | 2.5 (v)                                  | No                                                         | 0.5 cm in diameter                  |
|                   | 2.8, 4.1 (v)                             | No                                                         | Thickened skin                      |
|                   | Other vaccinates                         | No                                                         | No                                  |
|                   | All controls                             | No                                                         | No                                  |

(v): vaccinated rabbit

(c): unvaccinated control rabbit

**Table S1A. Observed clinical and local reactions in Study 1 (SPF rabbits)**

| Study day | Rabbit           | Local reaction left injection site | Local reaction right injection site |
|-----------|------------------|------------------------------------|-------------------------------------|
| Day 27    | 3.2 (v)          | 0.2 cm in diameter                 | 0.5 x 1 cm                          |
|           | 2.5 (v)          | No                                 | 0.5 cm in diameter                  |
|           | 2.8, 4.1 (v)     | No                                 | Thickened skin                      |
|           | Other vaccinates | No                                 | No                                  |
|           | All controls     | No                                 | No                                  |
| Day 28    | 3.2 (v)          | 0.2 cm in diameter                 | 0.2 x 0.5 cm                        |
|           | 2.5 (v)          | No                                 | 0.3 cm in diameter                  |
|           | 2.7 (c)          | No                                 | 1 x 1.5 cm                          |
|           | Other vaccinates | No                                 | No                                  |
|           | All controls     | No                                 | No                                  |
| Day 29    | 3.2 (v)          | 0.2 cm in diameter                 | 0.2 cm in diameter                  |
|           | 2.7 (c)          | No                                 | 1.5 cm in diameter                  |
|           | Other vaccinates | No                                 | No                                  |
|           | All controls     | No                                 | No                                  |
| Day 30    | 3.2 (v)          | 0.2 cm in diameter                 | No                                  |
|           | 2.7 (c)          | No                                 | 1.5 cm in diameter                  |
|           | Other vaccinates | No                                 | No                                  |
|           | All controls     | No                                 | No                                  |
| Day 31    | 3.2 (v)          | 0.2 cm in diameter                 | No                                  |
|           | 2.7 (c)          | No                                 | 1.5 cm in diameter                  |
|           | Other vaccinates | No                                 | No                                  |
|           | All controls     | No                                 | No                                  |
| Day 32    | 3.2 (v)          | 0.2 cm in diameter                 | No                                  |
|           | 2.3 (c)          | No                                 | small scrabs                        |
|           | 2.7 (c)          | No                                 | 1.5 cm in diameter                  |
|           | Other vaccinates | No                                 | No                                  |
|           | All controls     | No                                 | No                                  |
| Day 33    | 3.2 (v)          | 0.2 cm in diameter                 | No                                  |
|           | 2.3 (c)          | No                                 | small scrabs                        |
|           | 2.7 (c)          | No                                 | 1.5 cm in diameter                  |
|           | Other vaccinates | No                                 | No                                  |
|           | All controls     | No                                 | No                                  |
| Day 34    | 3.2 (v)          | 0.2 cm in diameter                 | No                                  |
|           | 2.3 (c)          | No                                 | small scrabs                        |
|           | 2.7 (c)          | No                                 | 1.5 cm in diameter                  |
|           | Other vaccinates | No                                 | No                                  |
|           | All controls     | No                                 | No                                  |
| Day 35    | 2.3 (c)          | No                                 | scabs                               |
|           | 2.7 (c)          | No                                 | 1.5 cm in diameter                  |
|           | Other vaccinates | No                                 | No                                  |
|           | All controls     | No                                 | No                                  |

(v): vaccinated rabbit

(c): unvaccinated control rabbit

**Table S1B. Observed clinical and local reactions in Study 2 (DB rabbits)**

| Study day | Rabbit                                   | Local reaction left injection site | Local reaction right injection site |
|-----------|------------------------------------------|------------------------------------|-------------------------------------|
| Day 7     | 2.3 (v)                                  | 0.5 x 1.5 cm diameter              | N.a.                                |
|           | Other vaccinates                         | No                                 | N.a.                                |
|           | All controls                             | No                                 | N.a.                                |
| Day 8     | 1.1; 1.3; 2.5; 3.1;<br>4.1; 4.3; 4.4 (v) | Thickened skin                     | N.a.                                |
|           | 2.3 (v)                                  | 0.5 x 1.5 cm diameter              | N.a.                                |
|           | Other vaccinates                         | No                                 | N.a.                                |
|           | All controls                             | No                                 | N.a.                                |
| Day 10    | 1.3; 2.2; 2.5; 2.6;<br>4.4 (v)           | Thickened skin                     | N.a.                                |
|           | 1.1; 3.1 (v)                             | 1 x 2 cm diameter                  | N.a.                                |
|           | 2.3 (v)                                  | 1 x 1.5 cm diameter                | N.a.                                |
|           | Other vaccinates                         | No                                 | N.a.                                |
|           | All controls                             | No                                 | N.a.                                |
| Day 13    | 1.3; 2.2; 2.5; 2.6;<br>4.4 (v)           | Thickened skin                     | N.a.                                |
|           | 1.1; 2.3 (v)                             | 1 x 1.5 cm diameter                | N.a.                                |
|           | 3.1 (v)                                  | 1 x 2 cm diameter                  | N.a.                                |
|           | Other vaccinates                         | No                                 | N.a.                                |
|           | All controls                             | No                                 | N.a.                                |
| Day 15    | 2.5; 2.6; 4.4 (v)                        | Thickened skin                     | N.a.                                |
|           | 1.1; 2.3 (v)                             | 1 cm in diameter                   | N.a.                                |
|           | 3.1 (v)                                  | 1 x 1.5 cm diameter                | N.a.                                |
|           | Other vaccinates                         | No                                 | N.a.                                |
|           | All controls                             | No                                 | N.a.                                |
| Day 17    | 1.1; 2.3; 2.5; 2.6;<br>4.4 (v)           | Thickened skin                     | N.a.                                |
|           | 3.1 (v)                                  | 0.2 x 1 cm                         | N.a.                                |
|           | Other vaccinates                         | No                                 | N.a.                                |
|           | All controls                             | No                                 | N.a.                                |
| Day 23    | 1.3; 3.1 (v)                             | N.a.                               | 0.5 cm in diameter                  |
|           | Other vaccinates                         | N.a.                               | No                                  |
|           | All controls                             | N.a.                               | No                                  |
| Day 24    | 1.3 (v)                                  | N.a.                               | 0.5 cm in diameter                  |
|           | 3.1 (v)                                  | N.a.                               | 1 cm in diameter                    |
|           | Other vaccinates                         | N.a.                               | No                                  |
|           | All controls                             | N.a.                               | No                                  |
| Day 25    | 1.3; 2.5 (v)                             | N.a.                               | 0.5 cm in diameter                  |
|           | 3.1 (v)                                  | N.a.                               | 1 cm in diameter                    |
|           | Other vaccinates                         | N.a.                               | No                                  |
|           | All controls                             | N.a.                               | No                                  |
| Day 26    | 1.3; 2.5 (v)                             | N.a.                               | 0.5 cm in diameter                  |
|           | 3.1 (v)                                  | N.a.                               | 1 cm in diameter                    |
|           | Other vaccinates                         | N.a.                               | No                                  |
|           | All controls                             | N.a.                               | No                                  |
| Day 27    | 1.3 (v)                                  | N.a.                               | 0.2 cm in diameter                  |
|           | 2.5; 3.1 (v)                             | N.a.                               | 0.5 cm in diameter                  |
|           | Other vaccinates                         | N.a.                               | No                                  |
|           | All controls                             | N.a.                               | No                                  |

(v): vaccinated rabbit

(c): unvaccinated control rabbit

**Table S2A. Macroscopic analysis injection sites**

MACROSCOPIC ANALYSIS AND SCORING OF LOCAL REACTIONS

\*Aspects of the local reaction:

- 0: no local reaction present
- 1: homogenous area
- 2: irregular area

\* Color of the local reaction: one of the option below will be chosen:

- 0: normal
- 1: pale (grey discoloration)
- 2: white color (possibly near vaccine-/test article residues)
- 3: redness
- 4: yellow discoloration
- 5: green discoloration
- 6: other (report explicitly)

\* Presence of clear recognizable test article residues:

(possible adjuvant residues will be considered as test article residues)

- 0: no
- 1: minimal test article residues (<10% of the administered volume)
- 2: extensive vaccine/ test article residues (≥10% of the administered volume)
- 3: vaccine/ test article residues are spread over multiple separated sites

\* presence of haemorrhages on the area of administration:

- 0: no
- 1: minimal haemorrhages (limited haemorrhages in the direct area of administration)
- 2: extensive haemorrhages (severe haemorrhages near and around the area of administration)
- 3: presence of clotted blood on and around the area of administration

\* Oedema on the area of administration:

- 0: no
- 1: minimal oedema (limited oedema near the area of administration)
- 2: extensive oedema (severe oedema near and around the area of administration)

\* Consistency of the tissue on the area of administration:

- 0: no changes, same consistency as surrounding tissue
- 1: softening
- 2: hardening

\* Abscess formation on the area of administration:

- 0: absent
- 1: abscess formation (diameter smaller or equal to ±1cm)
- 2: abscess formation (diameter larger than ±1cm)
- 3: in case several abscesses also note the amount of abscesses

**Table S2B. Macroscopic analysis injection sites Study 1 (SPF rabbits)**

| Group      | Rabbit number      | Size (hwxwd) (cm) | Aspects | Color | Vaccin/ test article residue | Heamorrhages | Oedeem | Consistency | Abscess |
|------------|--------------------|-------------------|---------|-------|------------------------------|--------------|--------|-------------|---------|
| Vaccinates | 2.1 R              | -                 | 0       | 0     | 0                            | 0            | 0      | 0           | 0       |
|            | 2.1 L              | -                 | 0       | 0     | 0                            | 0            | 0      | 0           | 0       |
|            | 2.2 R              | -                 | 0       | 0     | 0                            | 0            | 0      | 0           | 0       |
|            | 2.2 L              | 1.0x1.0x0.1       | 1       | 4     | 0                            | 0            | 0      | 0           | 0       |
|            | 2.5 R              | 1.0x1.0x0.1       | 1       | 4     | 0                            | 0            | 0      | 0           | 0       |
|            | 2.5 L              | -                 | 0       | 0     | 0                            | 0            | 0      | 0           | 0       |
|            | 2.6 R              | -                 | 0       | 0     | 0                            | 0            | 0      | 0           | 0       |
|            | 2.6 L              | -                 | 0       | 0     | 0                            | 0            | 0      | 0           | 0       |
|            | 2.8 R              | -                 | 0       | 0     | 0                            | 0            | 0      | 0           | 0       |
|            | 2.8 L              | 0.5x0.5x0.1       | 1       | 4     | 0                            | 0            | 0      | 0           | 0       |
|            | 3.2 R              | -                 | 0       | 0     | 0                            | 0            | 0      | 0           | 0       |
|            | 3.2 L              | 0.1x0.1x0.05      | 1       | 3     | 0                            | 1            | 0      | 0           | 0       |
|            | 3.3 R <sup>#</sup> | 1.5x1.0x0.1       | 1       | 3     | 0                            | 1            | 0      | 0           | 0       |
|            | 3.3 L              | -                 | 0       | 0     | 0                            | 0            | 0      | 0           | 0       |
|            | 3.5 R              | 1.0x1.0x0.1       | 1       | 3/4   | 0                            | 0            | 0      | 0           | 0       |
|            | 3.5 L              | -                 | 0       | 0     | 0                            | 0            | 0      | 0           | 0       |
|            | 3.6 R              | 1.0x0.5x0.1       | 1       | 3     | 0                            | 1            | 0      | 0           | 0       |
|            | 3.6 L              | 1.0x1.0x0.1       | 1       | 4     | 0                            | 0            | 0      | 0           | 0       |
|            | 4.1 R              | 0.5x0.5x0.1       | 1       | 4     | 0                            | 1            | 0      | 0           | 0       |
|            | 4.1 L              | -                 | 0       | 0     | 0                            | 0            | 0      | 0           | 0       |
| 4.3 R      | 1.0x0.1x0.1        | 1                 | 4       | 0     | 1                            | 0            | 0      | 0           |         |
| 4.3 L      | -                  | 0                 | 0       | 0     | 0                            | 0            | 0      | 0           |         |
| Controls   | 2.3 R*             | -                 | 0       | 0     | 0                            | 0            | 0      | 0           | 0       |
|            | 2.3 L              | -                 | 0       | 0     | 0                            | 0            | 0      | 0           | 0       |
|            | 2.4 R              | 0.5x0.5x0.1       | 1       | 4     | 0                            | 0            | 0      | 0           | 0       |
|            | 2.4 L              | 1.0x1.0x0.1       | 1       | 4     | 0                            | 0            | 0      | 0           | 0       |

R: right injection site (repeated dose)

L: left injection site (10x overdose)

\* Scabs on the surface of the skin

# Hemorrhage is located on the location of the transponder

**Table S2C. Macroscopic analysis injection sites Study 2 (DB rabbits)**

| Group      | Rabbit number | Size (hxwxd)<br>(cm) | Aspects | Color | Vaccin/ test<br>article<br>residue | Heamorrhages | Oedeem | Consistency | Abscess |
|------------|---------------|----------------------|---------|-------|------------------------------------|--------------|--------|-------------|---------|
| Vaccinates | 1.1 L         | -                    | 0       | 0     | 0                                  | 0            | 0      | 0           | 0       |
|            | 1.1 R         | -                    | 0       | 0     | 0                                  | 0            | 0      | 0           | 0       |
|            | 1.3 L         | -                    | 0       | 0     | 0                                  | 0            | 0      | 0           | 0       |
|            | 1.3 R         | -                    | 0       | 0     | 0                                  | 0            | 0      | 0           | 0       |
|            | 2.2 L         | -                    | 0       | 0     | 0                                  | 0            | 0      | 0           | 0       |
|            | 2.2 R         | -                    | 0       | 0     | 0                                  | 0            | 0      | 0           | 0       |
|            | 2.3 L         | -                    | 0       | 0     | 0                                  | 0            | 0      | 0           | 0       |
|            | 2.3 R         | -                    | 0       | 0     | 0                                  | 0            | 0      | 0           | 0       |
|            | 2.5 L         | -                    | 0       | 0     | 0                                  | 0            | 0      | 0           | 0       |
|            | 2.5 R         | -                    | 0       | 0     | 0                                  | 0            | 0      | 0           | 0       |
|            | 2.6 L         | -                    | 0       | 0     | 0                                  | 0            | 0      | 0           | 0       |
|            | 2.6 R         | -                    | 0       | 0     | 0                                  | 0            | 0      | 0           | 0       |
|            | 3.1 L         | -                    | 0       | 0     | 0                                  | 0            | 0      | 0           | 0       |
|            | 3.1 R         | -                    | 0       | 0     | 0                                  | 0            | 0      | 0           | 0       |
|            | 4.1 L         | -                    | 0       | 0     | 0                                  | 0            | 0      | 0           | 0       |
|            | 4.1 R         | -                    | 0       | 0     | 0                                  | 0            | 0      | 0           | 0       |
|            | 4.3 L         | -                    | 0       | 0     | 0                                  | 0            | 0      | 0           | 0       |
|            | 4.3 R         | -                    | 0       | 0     | 0                                  | 0            | 0      | 0           | 0       |
|            | 4.4 L         | -                    | 0       | 0     | 0                                  | 0            | 0      | 0           | 0       |
|            | 4.4 R         | -                    | 0       | 0     | 0                                  | 0            | 0      | 0           | 0       |
| 4.5 L      | -             | 0                    | 0       | 0     | 0                                  | 0            | 0      | 0           |         |
| 4.5 R      | -             | 0                    | 0       | 0     | 0                                  | 0            | 0      | 0           |         |
| Controls   | 1.2 L         | -                    | 0       | 0     | 0                                  | 0            | 0      | 0           | 0       |
|            | 1.2 R         | -                    | 0       | 0     | 0                                  | 0            | 0      | 0           | 0       |
|            | 2.1 L         | -                    | 0       | 0     | 0                                  | 0            | 0      | 0           | 0       |
|            | 2.1 R         | -                    | 0       | 0     | 0                                  | 0            | 0      | 0           | 0       |

R: right injection site (repeated dose)

L: left injection site (10x overdose)

**Table S3A. Histological analysis of the injection sites Study 1 (SPF rabbits)**

| <b>Animal no.</b> | <b>Histological description injection site</b>                                                                                                                                                                                                                                                                                                                                                                                                                                                                                                       |
|-------------------|------------------------------------------------------------------------------------------------------------------------------------------------------------------------------------------------------------------------------------------------------------------------------------------------------------------------------------------------------------------------------------------------------------------------------------------------------------------------------------------------------------------------------------------------------|
| 2.1R              | No abnormalities detected                                                                                                                                                                                                                                                                                                                                                                                                                                                                                                                            |
| 2.1L              | No abnormalities detected                                                                                                                                                                                                                                                                                                                                                                                                                                                                                                                            |
| 2.2R              | No abnormalities detected                                                                                                                                                                                                                                                                                                                                                                                                                                                                                                                            |
| 2.2L              | No abnormalities detected                                                                                                                                                                                                                                                                                                                                                                                                                                                                                                                            |
| 2.3R              | Ulceration of the epidermis with crust formation on the surface and associated with area of edema, haemorrhage and aggregation of hypertrophic fibroblasts spindle shaped with large nuclei/nucleoli.                                                                                                                                                                                                                                                                                                                                                |
| 2.3L              | No abnormalities detected                                                                                                                                                                                                                                                                                                                                                                                                                                                                                                                            |
| 2.4R              | First slide: No abnormalities detected, but epidermis missing. Therefore extra slides made.<br>Extra slides ( 4x) : Epidermis present; no abnormalities detected                                                                                                                                                                                                                                                                                                                                                                                     |
| 2.4L              | First slide: No abnormalities detected, but epidermis missing. Therefore extra slides made.<br>Extra slides ( 3x): Epidermis present; no abnormalities detected                                                                                                                                                                                                                                                                                                                                                                                      |
| 2.5R              | No abnormalities detected                                                                                                                                                                                                                                                                                                                                                                                                                                                                                                                            |
| 2.5L              | First slide: Focally perivascular mononuclear cell aggregation in the dermis. Mild degeneration of (single) muscle fibers associated with area of edema. Subdermal small capillaries congested. But epidermis almost completely absent. Therefore extra slides made.<br>Extra slides (3x): Epidermis present; 2x no abnormalities detected, 1x degeneration of single muscle fiber associated with minimal mononuclear cell aggregation. Focally submuscular subcutaneous mononuclear cell aggregation with vacuolated macrophages ( multinucleated) |
| 2.6R              | Focally degenerative and regenerative changes in single muscle fibers                                                                                                                                                                                                                                                                                                                                                                                                                                                                                |
| 2.6L              | No abnormalities detected                                                                                                                                                                                                                                                                                                                                                                                                                                                                                                                            |
| 2.8R              | No abnormalities detected                                                                                                                                                                                                                                                                                                                                                                                                                                                                                                                            |
| 2.8L              | Focally perivascular mononuclear cell aggregation associated with proliferative changes of the endothelium                                                                                                                                                                                                                                                                                                                                                                                                                                           |
| 3.2R              | No abnormalities detected                                                                                                                                                                                                                                                                                                                                                                                                                                                                                                                            |
| 3.2L              | Focally mild degeneration of (single) muscle fibers                                                                                                                                                                                                                                                                                                                                                                                                                                                                                                  |
| 3.3R              | Focally minimal mononuclear ( plasma cells) cell aggregation in the dermis. Subcutaneous minimal edema with presence of few hypertrophic fibroblasts and congestion of microcapillaries                                                                                                                                                                                                                                                                                                                                                              |
| 3.3L              | No abnormalities detected                                                                                                                                                                                                                                                                                                                                                                                                                                                                                                                            |
| 3.5R              | Mild perivascular and intramuscular mononuclear cell aggregation                                                                                                                                                                                                                                                                                                                                                                                                                                                                                     |
| 3.5L              | Minimal subdermal mononuclear cell aggregation associated with degenerative /regenerative changes of ( single) muscle fibers                                                                                                                                                                                                                                                                                                                                                                                                                         |
| 3.6R              | Subcutaneous area with edema, hemorrhages, congested microcapillaries and hyperplastic fibroblasts. Degeneration of single muscle fibers                                                                                                                                                                                                                                                                                                                                                                                                             |
| 3.6L              | Focally minimal mononuclear cell aggregation . area with subcutaneous edema.                                                                                                                                                                                                                                                                                                                                                                                                                                                                         |
| 4.1R              | No abnormalities detected                                                                                                                                                                                                                                                                                                                                                                                                                                                                                                                            |
| 4.1L              | No abnormalities detected                                                                                                                                                                                                                                                                                                                                                                                                                                                                                                                            |
| 4.3R              | Subcutaneous mild mononuclear cell aggregation ( adipose tissue). Dermal area with minimal haemorrhage. Focally perifollicular mononuclear cell aggregation                                                                                                                                                                                                                                                                                                                                                                                          |
| 4.3L              | Focally perivascularitis with mononuclear cell aggregation in the lamina muscularis. Minimal degeneration of ( single) muscle fibers sometimes associated with minimal mononuclear cell aggregation                                                                                                                                                                                                                                                                                                                                                  |

Vaccinates: 2.1, 2.2, 2.5, 2.6, 2.8, 3.2, 3.3, 3.5, 3.6, 4.1, 4.3.

Non-vaccinated controls: 2.3 and 2.4.

R: right injection site (repeated dose).

L: left injection site (10x overdose).

**Table S3B. Histological analysis of the injection sites Study 2 (DB rabbits)**

| <b>Animal no.</b> | <b>Histological description injection site</b>                                                                                                                                                                                                                                                                                                              |
|-------------------|-------------------------------------------------------------------------------------------------------------------------------------------------------------------------------------------------------------------------------------------------------------------------------------------------------------------------------------------------------------|
| 1.1Left           | Multifocally perivascularitis in the dermis and subdermal muscular and collagenous tissue, consisting of mononuclear cell aggregation surrounding smaller capillaries and focally a larger arterial blood vessel. Focally small haemorrhage. Multifocally degeneration of muscle fibers. Focally folliculitis with eosinophilic granular cell infiltration. |
| 1.1Right          | Focally minimal degeneration of small single muscle fibers                                                                                                                                                                                                                                                                                                  |
| 1.2Left           | Mild degeneration of muscle fibers                                                                                                                                                                                                                                                                                                                          |
| 1.2Right          | Focally degeneration of single muscle fibers                                                                                                                                                                                                                                                                                                                |
| 1.3Left           | Focally minimal mononuclear cell aggregation in the dermis. Few foci of vasculitis with minimal mononuclear cell aggregation surrounding small capillaries. Area with degeneration of single muscle fibers.                                                                                                                                                 |
| 1.3Right          | Focally de- and regenerative changes in single muscle fibers. Few tiny subdermal hemorrhages. Focally minimal mononuclear cell aggregation in adipose tissue                                                                                                                                                                                                |
| 2.1Left           | Tiny focus of mononuclear cell aggregation in the dermis, small perifollicular hemorrhage                                                                                                                                                                                                                                                                   |
| 2.1Right          | No abnormalities detected                                                                                                                                                                                                                                                                                                                                   |
| 2.2Left           | Focally minimal mononuclear cell aggregation in the dermis                                                                                                                                                                                                                                                                                                  |
| 2.2Right          | No abnormalities detected                                                                                                                                                                                                                                                                                                                                   |
| 2.3Left           | Few foci of vasculitis with minimal mononuclear cell aggregation surrounding small capillaries. Degeneration of single muscle fibers                                                                                                                                                                                                                        |
| 2.3Right          | Multifocally degeneration of muscle fibers. Subcutaneous area with mixed inflammatory cell infiltration (mononuclear cells, macrophages, plasma cells, granulocytes) with karyorrhexis interspersed with degenerative collagen fibers and amorphous irregular coloured material.                                                                            |
| 2.5Left           | Multiple areas with degeneration of muscle fibers. Focally minimal mononuclear cell aggregation surrounding muscle fibers                                                                                                                                                                                                                                   |
| 2.5Right          | Minimal degeneration of single muscle fibers                                                                                                                                                                                                                                                                                                                |
| 2.6Left           | Minimal degeneration of single muscle fibers                                                                                                                                                                                                                                                                                                                |
| 2.6Right          | Focally degeneration of single muscle fibers                                                                                                                                                                                                                                                                                                                |
| 3.1Left           | Multifocally minimal perivascular and/or perineural mononuclear cell aggregation in the dermis. Area with degeneration of muscle fibers                                                                                                                                                                                                                     |
| 3.1Right          | Dermal small focus of mononuclear cell aggregation. Minimal degeneration of single muscle fibers                                                                                                                                                                                                                                                            |
| 4.1Left           | Focally degeneration of single muscle fibers                                                                                                                                                                                                                                                                                                                |
| 4.1Right          | Minimal degeneration of single muscle fibers                                                                                                                                                                                                                                                                                                                |
| 4.3Left           | Minimal degeneration of single muscle fibers                                                                                                                                                                                                                                                                                                                |
| 4.3Right          | Focally minimal subepidermal mixed inflammatory cell aggregation. Focally minimal degeneration of single muscle fibers.                                                                                                                                                                                                                                     |
| 4.4left           | Minimal degeneration of single muscle fibers                                                                                                                                                                                                                                                                                                                |
| 4.4Right          | Minimal degeneration of single muscle fibers                                                                                                                                                                                                                                                                                                                |
| 4.5Left           | No abnormalities detected                                                                                                                                                                                                                                                                                                                                   |
| 4.5Right          | Minimal degeneration of single muscle fibers                                                                                                                                                                                                                                                                                                                |

Vaccinates: 1.1; 1.3; 2.2; 2.3; 2.5; 2.6; 3.1; 4.1; 4.3; 4.4 and 4.5

Non-vaccinated controls: 1.2.and 2.1.

Right: right injection site (repeated dose).

Left: left injection site (10x overdose).



**Table S4. Summary of antibody titers to RHDV1, RHDV2 and myxoma virus**

**Table S4A. Antibody titre in SPF rabbits.**

|                   | Titre to RHDV1 (log <sub>2</sub> ) |        |        | Titre to RHDV2 (log <sub>2</sub> ) |        |        | Titre to myxoma virus (log <sub>2</sub> ) |        |        |
|-------------------|------------------------------------|--------|--------|------------------------------------|--------|--------|-------------------------------------------|--------|--------|
|                   | Day 0                              | Day 21 | Day 35 | Day 0                              | Day 21 | Day 35 | Day 0                                     | Day 21 | Day 35 |
| <b>Vaccinates</b> | <1*                                | 5.3    | 6.0    | <1                                 | 6.6    | 7.5    | <6 <sup>#</sup>                           | 14.7   | 12.5   |
| <b>Controls</b>   | <1                                 | <1     | <1     | <1                                 | <1     | <1     | <6                                        | <6     | <6     |

**Table S4B. Antibody titres in DB rabbits.**

|                   | Average titre to RHDV1 (log <sub>2</sub> ) |        |        | Average titre to RHDV2 (log <sub>2</sub> ) |        |        | Average titre to myxoma virus (log <sub>2</sub> ) |        |        |
|-------------------|--------------------------------------------|--------|--------|--------------------------------------------|--------|--------|---------------------------------------------------|--------|--------|
|                   | Day 0                                      | Day 21 | Day 35 | Day 0                                      | Day 21 | Day 35 | Day 0                                             | Day 21 | Day 35 |
| <b>Vaccinates</b> | <1*                                        | 4.5    | 7.7    | <1                                         | 2.5    | 3.4    | <6 <sup>#</sup>                                   | 12.1   | 13.5   |
| <b>Controls</b>   | <1                                         | <1     | <1     | <1                                         | <1     | <1     | <6                                                | <6     | <6     |

\* For RHDV a titre <1 is considered negative.

# For myxoma virus a titre <6 is considered negative.
